# Inhibiting ACSL1 related ferroptosis restrains MHV-A59 infection

2

3 Huawei Xia<sup>1</sup>, Zeming Zhang<sup>1</sup>, Fuping You<sup>1, \*</sup>.

4

5 <sup>1</sup>Department of Systems Biomedicine, Institute of Systems Biomedicine, School of Basic

6 Medical Sciences, Peking University Health Science Center, Beijing, China.

7 \*Corresponding author

8

9 Address correspondence and reprint requests to Dr. Fuping You, Institute of Systems

10 Biomedicine, School of Basic Medical Sciences, Peking University Health Science Center,

11 Beijing 100191, China. E-mail address: fupingyou@hsc.pku.edu.cn

12

13

14

15 Abstract

16

17 Murine hepatitis virus strain A59 (MHV-A59) belongs to the  $\beta$ -coronavirus and is

18 considered as a representative model for studying coronavirus infection. MHV-A59 was

19 shown to induce pyroptosis, apoptosis and necroptosis of infected cells, especially the

20 murine macrophages. However, whether ferroptosis, a recently identified form of lytic cell

21 death, was involved in the pathogenicity of MHV-A59, is unknown. Here, we demonstrate

22 inhibiting ferroptosis suppresses MHV-A59 infection. MHV-A59 infection upregulates the

23 expression of *Acs/1*, a novel ferroptosis inducer. MHV-A59 upregulates *Acs/1* expression  
 24 depending on the NF- $\kappa$ B activation, which is TLR4-independent. Ferroptosis inhibitor  
 25 inhibits viral propagation, inflammatory cytokines release and MHV-A59 infection induced  
 26 cell syncytia formation. ACSL1 inhibitor Triacsin C suppresses MHV-A59 infection  
 27 induced syncytia formation and viral propagation. *In vivo* administration of liproxstatin-1  
 28 ameliorates lung inflammation and tissue injuries caused by MHV-A59 infection.  
 29 Collectively, these results indicate that ferroptosis inhibition protects hosts from MHV-A59  
 30 infection. Targeting ferroptosis may serves as a potential treatment approach for dealing  
 31 with hyper-inflammation induced by coronavirus infection.

32

33

34

35 Introduction

36

37 SARS-CoV-2, the causative agent of the coronavirus disease 2019 (COVID-19), has  
 38 resulted in more than 4 million deaths worldwide. Thus, studying coronavirus and  
 39 interaction between coronavirus and hosts can help understand the mechanism within the  
 40 infection process and provide new approaches for clinical treatment. Murine hepatitis virus  
 41 strain A59 (MHV-A59) is a well-studied coronavirus infection model (1). It has been  
 42 validated that lung infection of MHV-A59 was sufficient to cause pneumonia and severe  
 43 lung injuries (2, 3). Expression of inflammatory cytokines such as *Cxcl10*, *Il1g* and *Il6*  
 44 were potently elevated in the lungs of infected mice. Mice with intranasal inoculation of

45 MHV-A59 exhibited typical acute inflammatory response with large areas of hemorrhages.

46 Our previous study also showed that intranasal MHV-A59 infection mouse model

47 mimicked the hyper-inflammation induced by SARS-CoV-2 infection (4), further

48 suggesting that intranasal inoculation with MHV-A59 can serve as a surrogate mouse

49 model for studying COVID-19.

50 Ferroptosis is a newly identified iron-dependent necrotic cell death, mainly raised by the

51 accumulation of lipid reactive oxygen species (ROS), resulting in excessive lipid

52 peroxidation and subsequent cell membrane damage (5, 6, 7). Ferroptosis can be divided

53 into two types, namely canonical and non-canonical types, according to their dependency

54 on the involvement of GPX4. In the canonical ferroptosis, inactivation or depletion of

55 GPX4 leads to the lack of glutathione (GSH) and lipid ROS overload, making the cell

56 membrane vulnerable to lipid peroxidation (8). The non-canonical ferroptosis is

57 characterized by the inactivation of ferroptosis suppressor protein 1 (FSP1), which

58 maintains the active pool of radical-trapping antioxidant coenzyme Q10 (9, 10). In addition,

59 cystine/glutamate transporter (xCT), encoded by *Slc7a11*, transfers cystine, the central

60 material for generating GSH, into the cytosol to prevent ROS overload induced cell

61 damage (11). Peroxidation of phospholipid species acts as the execution stage of

62 ferroptosis. At the execution stage, for example, polyunsaturated fatty acids (PUFAs) can

63 be esterified by acyl-CoA synthetase long-chain family member 4 (ACSL4), which occurs

64 at the cell membrane, leading to the cell membrane rupture (12, 13, 14). Recently,

65 acyl-CoA synthetase long-chain family member 1 (ACSL1) was uncovered as a

66 ferroptosis promoter (15). ACSL1 promoted  $\alpha$ -eleostearic acid ( $\alpha$ ESA) triggered

67 ferroptosis. However, the  $\alpha$ ESA triggered ACSL1 dependent ferroptosis was distinct from  
68 the ferroptosis induced by the canonical ferroptosis inducers, including the GPX4 inhibitor  
69 ML160 and the FSP1 inhibitor iFSP1. ACSL1 has only been validated to participant in a  
70 murine breast cancer xenograft model (16). How ACSL1 involves in other biological  
71 processes is unknown.

72 Viral infection induces various kinds of programed cell death, including apoptosis,  
73 necroptosis and pyroptosis (17). For the  $\beta$ -coronavirus infection, cells were reported to  
74 undergo PANoptosis, which consisted of Pyroptosis, Apoptosis and Necroptosis (18, 19).  
75 Previous studies have shown that SARS-CoV-2 can induce these three kinds of  
76 programed cell death in susceptible epithelial cells and immune cells (20, 21, 22). As for  
77 ferroptosis, whose morphological and biochemical features are distinct from PANoptosis,  
78 new castle virus (NDV) was the first virus to be discovered as ferroptosis inducer in tumor  
79 cells (23). NDV infection reduced the expression of *Slc7a11* and *Gpx4*, resulting in the  
80 ferroptosis of infected cells. Apart from NDV, so far, no other viruses were reported to  
81 induce ferroptosis of infected cells, although hepatitis B, hepatitis C, HIV-1 and human  
82 cytomegalovirus infection caused increased serum iron level (24, 25).

83 Ferroptosis has been linked with inflammation and immune responses. In innate immunity,  
84 GPX4 deficiency dampens cGAS-STING dependent innate immune signaling activation  
85 (26). Neutrophils from systemic lupus erythematosus (SLE) patients exhibit ferroptosis  
86 due to the transcriptional repression of *GPX4* (27). In adaptive immunity, GPX4 is  
87 essential for maintaining the metastasis of T<sub>FH</sub> cells and promotes humoral immune  
88 responses (28). Ferroptosis of non-leukocytic cells often results in the release and

89 activation of different damage-associated molecular pattern (DAMP), triggering the  
 90 inflammatory responses (29, 30). Because COVID-19 patients suffered from systemic  
 91 hyper-inflammation, characterized by ROS elevation and cytokine storm, SARS-CoV-2  
 92 infection was predicted to involve ferroptosis (31, 32, 33). The prediction was also  
 93 evidenced by the elevated serum iron load in COVID-19 patients and decreased *GPX4*  
 94 expression in SARS-CoV-2 infected cells (34, 35, 36). Here we showed that MHV-A59  
 95 infection induced *Acs/1* expression and ferroptosis of murine macrophages. Inhibition of  
 96 ACSL1 with Triacsin C and ferroptosis inhibitors protected cells from MHV-A59 infection.  
 97 Intranasal inoculation of liproxstatin-1 ameliorated MHV-A59 infection induced  
 98 hemorrhagic alterations and immune cells infiltration in lungs of infected mice. Our study  
 99 provides evidence for targeting ferroptosis to deal with coronavirus infection.

100

101

102

## 103 Results

104

### 105 Ferroptosis inhibitors suppressed syncytia formation after MHV-A59 infection

106

107 Coronavirus infection results in typical cell-cell fusion named syncytia (37). Syncytia  
 108 formation of SARS-CoV-2 or MHV-A59 infected cells mainly depends on the interaction  
 109 between spike protein and receptors and indicates the viral abundance and cellular  
 110 antiviral mechanism (38). Although certain cell types such as lung epithelial cells and

colorectal epithelial cells are susceptible to SARS-CoV-2, it has been reported that SARS-CoV-2 was able to infect macrophages (39, 40, 41). Both MHV-A59 and SARS-CoV-2 can infect murine macrophages. MHV-A59 infected murine bone marrow derived macrophages (BMDMs) and peritoneal macrophages (PMs) via the canonical receptor Ceacam1 (42), while Nrp1 mediated SARS-CoV-2 infection of murine macrophages and human olfactory epithelium (43, 44, 45). Given that coronavirus infection in macrophages promotes the inflammatory responses, which involves pro-inflammatory cell death programs, we intended to determine whether ferroptosis contributes to the pathogenicity of coronavirus. We first monitored cell morphology of both BMDM and PM after MHV-A59 infection for 24 hours. Cell-cell fusion resulted in multinucleated cell formation, followed by the appearance of squeezed out vacuole and subsequent cell death, which was ferroptosis-like (Video S1). It has been shown that syncytia were observed in tissues from deceased patients with pulmonary manifestations compared with those without pulmonary manifestations (38). We next used ferrostatin-1 (Fer-1), a ferroptosis inhibitor that functions via trapping radical, to check whether ferroptosis inhibition influenced MHV-A59 infection (46, 47). Syncytia formed by peritoneal macrophages was apparently inhibited by Fer-1 (Figure 1A and 1B). Besides, Fer-1 also protected cells from membrane damage (Figure 1C). In contrast, the caspase-3 inhibitor z-DEVD-FMK and caspase-1 inhibitor VX765 showed no obvious effect on cell membrane integrity maintenance, whereas the RIPK3 inhibitor GSK-872 exerted protective effects similar with Fer-1 (Figure 1D). Collectively, these results indicated that ferroptosis inhibition protected murine macrophages from MHV-A59 infection.

133

134 Ferroptosis inhibitors reduced viral load and inflammatory cytokine release after MHV-A59  
135 infection

136

137 We next intended to find how ferroptosis inhibitors restrict MHV-A59 infection. We first  
138 tested genomic RNA level of MHV-A59 after 2 hours of infection. Fer-1 administration had  
139 minimal effects on invasion of MHV-A59 into macrophages (Figure S1). After excluding  
140 the possibility that Fer-1 inhibited viral entry, we next wanted to know whether Fer-1  
141 inhibited MHV-A59 propagation. Interestingly, quantitative PCR results showed that  
142 intracellular MHV RNA level was identical or even slightly higher in cells treated with Fer-1  
143 after infection (Figure 2A). However, via evaluating the viral titer in the cell culture  
144 supernatant, we found that viral load was lower after Fer-1 treatment (Figure 2B). These  
145 results suggested that ferroptosis inhibition affected viral propagation of MHV-A59.

146 Because ferroptosis often occurs along with inflammatory cytokine release (48), we  
147 wanted to determine how ferroptosis inhibition influenced MHV-A59 induced inflammation.

148 Fer-1 treatment showed no significant effect on the expression of inflammatory cytokines  
149 (*Il6*, and *Cxcl10*) and type I interferon (*Ifnb1*) (Figure 2C and 2D). However, Fer-1 treated

150 macrophages released lower level of IL-6 (Figure 2E). These data suggested that

151 ferroptosis inhibition reduced inflammatory cytokine release after MHV-A59 infection. LDH

152 release level has been used to evaluate cell viability in lytic cell death. We thus also

153 checked effects of Fer-1 on LDH release after MHV-A59 infection. As shown in Figure 2F,

154 less LDH was released from Fer-1 treated cells, indicating the higher viability of cells after

155 ferroptosis inhibition. Taken together, these data indicated that ferroptosis inhibition  
156 restricted propagation of MHV-A59 and inflammatory cytokine release induced by  
157 MHV-A59 infection.

158

159 Liproxstatin-1 ameliorated MHV-A59 infection induced inflammation and lung injury

160

161 We next checked the efficiency of ferroptosis inhibitors on inhibiting MHV-A59 lung  
162 infection. We selected C57BL/6 mice to carry out the viral infection experiments, because  
163 intranasal inoculation of MHV-A59 was reported to cause severe lung inflammation and  
164 tissue injury in this mouse strain. Liproxstatin-1 (Lip-1) functions as another  
165 radical-trapping ferroptosis inhibitor and has been selected as ferroptosis inhibitor in  
166 several mouse models (8, 27). We thus assessed the influences of Lip-1 treatment on  
167 MHV-A59 lung infection. Daily intranasal treatment of Lip-1 was carried out after  
168 MHV-A59 infection until day 10 post infection (Figure 3A). Comparison of pathologic  
169 alterations in lungs of mice between MHV-A59 infection alone group and infection  
170 together with Lip-1 treatment group showed that Lip-1 treated group exhibited less severe  
171 pneumonia, characterized by less hemorrhagic alterations and less immune cells  
172 infiltration (Figure 3B, 3C and 3D). However, such model applying low dose of MHV-A59  
173 resulted in no significant difference in body weight changes between groups with or  
174 without Lip-1 treatment after MHV-A59 inoculation (Figure S2). Taken together, these  
175 data suggested that Lip-1 ameliorated inflammatory responses and tissue injury in lung  
176 after MHV-A59 infection.



177

178 MHV-A59 infection induced potent *Acs/1* expression

179

180 We next intended to investigate how MHV-A59 infection induced ferroptosis. Although  
181 MHV-A59 infection was reported to induce enrichment of serum iron level and ROS  
182 abundance elevation in infected mice, the executor of this process remained unclear,  
183 especially in terms of ferroptosis. We infected murine BMDMs and performed bulk  
184 RNA-seq to figure out the expression profile changes brought by MHV-A59 in innate  
185 immune cells. MHV-A59 infection led to canonical inflammatory genes upregulation,  
186 characterized by the elevated expression of genes responsible for inflammatory  
187 responses (Figure 4A). Interestingly, compared with other members of acyl-CoA  
188 synthetase long-chain family, we noticed that expression of the newly identified ferroptosis  
189 executor ACSL1 was potently induced by MHV-A59 (Figure 4B and 4C). The upregulation  
190 of *Acs/1* was further confirmed in the RNA-seq data of murine PMs infected with MHV-A59  
191 (Figure 4D). We also noticed the elevated expression of ferroptosis biomarker *Ptgs2* after  
192 MHV-A59 infection (49) (Figure 4E). We further checked the expression of *Acs/1* in  
193 several cell lines, turning out that apparent upregulation of *Acs/1* only occurred in primary  
194 macrophages (Figure 4F). In line with this, we failed to observe protective effects of  
195 ferroptosis inhibition after MHV-A59 infection in RAW 264.7 cells, compared with that  
196 observed in primary macrophages, suggesting that these protective effects may only exist  
197 in primary macrophages (Figure S3). We thus reckoned that MHV-A59 induced  
198 ferroptosis, which was dependent of the function of ACSL1. *Acs/1* was considered as an

199 indicator of severe sepsis in addition to *Acs/4* (50). Because TLR4 activation by ligands  
200 such as LPS was one of the dominant causes for severe sepsis in bacterial infection and  
201 TLR4 inhibition by TAK-242 alleviated fatal infection by MHV-A59 (51, 52, 4), we  
202 reasoned that *Acs/1* upregulation may be the consequence of TLR4 signaling activation.  
203 Results showed that TAK-242 treatment had no inhibitory effect on MHV infection  
204 enhanced *Acs/1* expression (Figure 4G). Considering that NF- $\kappa$ B activation was  
205 responsible for the explosive expression of various inflammatory genes and NF- $\kappa$ B  
206 inhibition suppressed *Acs/1* expression in hepatocellular carcinoma cells (53), we checked  
207 whether NF- $\kappa$ B inhibition attenuated *Acs/1* expression. As a result, the NF- $\kappa$ B inhibitor  
208 JSH-23 suppressed MHV infection induced *Acs/1* upregulation (Figure 4H). Together,  
209 these data suggested that MHV-A59 infection led to potent *Acs/1* upregulation in murine  
210 macrophages.

211

212 Inhibiting acyl-CoA synthetase long-chain family members suppressed MHV-A59 infection

213

214 Base on the results above, we suspected that targeting ACSL1 may help eliminate  
215 MHV-A59 infection. Two individual compound screening studies have found that Triacsin  
216 C inhibited SARS-CoV-2 replication (54, 55), supporting our hypothesis. We first  
217 determined the effects of ACSL1 inhibitor Triacsin C on MHV-A59 infection in murine  
218 macrophages. Triacsin C treatment significantly suppressed MHV-A59 propagation in  
219 both PMs and BMDMs (Figure 5A and 5B). In addition, Triacsin C also exerted little impact  
220 on inflammatory cytokines expression after MHV infection, similar with ferroptosis

221 inhibitors (Figure 5C and 5D). Furthermore, Triacsin C reduced MHV-A59 induced  
222 syncytia formation (Figure 5E and 5F, see also Figure S4). These results suggested that  
223 ACSL1 inhibitor Triacsin C suppressed MHV-A59 infection.

224

225

226

227 Discussion

228

229 In this study, we found that ferroptosis inhibitors alleviated MHV-A59 infection induced  
230 inflammation, cell syncytia formation and prevented cell death. MHV-A59 triggered potent  
231 *Acs/1* expression in murine macrophages and acyl-CoA synthesis inhibitor Triacsin C  
232 efficiently suppressed MHV-A59 infection. Our findings provided evidence for targeting  
233 ferroptosis inhibition in treating coronavirus infection related diseases.

234 Ferroptosis has been linked with inflammatory responses. Ferroptosis inhibition was  
235 reported to protect hepatocytes from necrotic death and suppressed immune cells  
236 infiltration in mouse nonalcoholic steatohepatitis (NASH) (57). The pro-inflammatory  
237 ligand LPS induced lipid peroxidation and injury of myofibroblast, which were inhibited by  
238 Fer-1 (58). The pro-inflammatory effects of ferroptosis can be attributed to the functional  
239 alterations of cells undergoing ferroptosis. On one hand, for immune cells, ferroptosis  
240 usually functioned via regulating their traditional activity. For example, ferroptosis in T  
241 cells suppressed T cell expansion and prevented viral clearance (59). Ferroptosis was  
242 involved in *Mycobacterium tuberculosis* induced necrotic cell death of macrophages and

243 was inhibited by Fer-1 (60). On the other hand, ferroptosis in somatic cells can trigger  
244 immune cell infiltration, leading to inflammation. One example is that ferroptotic cells  
245 release HMGB1, a kind of damage-associated molecular pattern molecules (DAMPs), and  
246 mediates inflammation in macrophages (29). Given the facts above, we speculated that  
247 ferroptosis inhibition may contribute to inflammation suppression in excessive  
248 inflammation, especially in terms of coronavirus infection. SARS-CoV-2 infection can  
249 result in systemic hyper-inflammation in severe COVID-19 patients, which may be partially  
250 due to occurrence of ferroptosis. Several reviews mentioned about the possibility of ROS  
251 elimination for treatment of COVID-19. Although in one case, the application of  
252 N-acetylcysteine (NAC), a ferroptosis inhibitor that promotes glutathione supplementation,  
253 restored glutathione levels in the SARS-CoV-2 infected cells and markedly reduced  
254 C-reactive protein (CRP) level in a severe COVID-19 patient, another randomized clinical  
255 trial indicated that high dose of NAC brought little benefit to retarding the evolution of  
256 severe COVID-19 (61, 62, 63). However, our results here showed that ferroptosis inhibitor  
257 suppressed inflammatory cytokines release and MHV-A59 propagation in murine  
258 macrophages. In addition, we found that ferroptosis inhibition protected mice from MHV  
259 caused lung injury *in vivo*. Our findings broadened the application of ferroptosis inhibitors  
260 in treatments of inflammatory diseases, especially the hyper-inflammation status in  
261 coronavirus infection.

262 Ferroptosis is a kind of necrotic cell death characterized by the damages on cell  
263 membrane. Cell membrane rupture in lytic cell death can lead to the release of cellular  
264 components independent of canonical secretory systems, including LDH, which has been

reckoned as a marker for evaluating the cell viability in lytic cell death, and cytokines such as IL-1B, TNF- $\alpha$ , IL-6 and CXCL-10. Differed from necroptosis and pyroptosis, until now, cell membrane rupture in ferroptosis is considered as the result of a chemical process named phospholipid peroxidation, compared with MLKL-dependent or Gasdermins-dependent pore formation. Phospholipid peroxidation on cell membrane can be reversed by free radical elimination or radical-trapping by compounds such as Fer-1 and Lip-1. Our results showed that Fer-1 and Lip-1 addition reduced viral load of MHV in cell culture supernatant, whereas the cellular level of MHV RNA was not significantly affected. This may be attributed to the reduced cell membrane damage, which may help prevent the release of viral particles. However, former studies claimed that MHV release from infected cells was mainly through lysosomes, raising the importance of inhibiting lysosome-dependent egress path. We propose that inhibiting both ferroptosis and lysosome trafficking can provide great assistance on restricting coronavirus invasion and propagation. Besides, reduced inflammatory cytokines release owing to the protective effects of ferroptosis inhibitors on cell membrane can contribute to the limitation of inflammation. Taken together, these effects indicated that cell membrane protection brought by ferroptosis inhibition can be considered as a method to restrict coronavirus infection.

ACSL1 plays important roles in regulating fatty acid metabolism in adipose tissue, liver, heart and many other tissues and organs. In immune system, upregulated *Acs/1* expression promoted inflammatory phenotype of macrophages isolated from mouse models of type 1 diabetes (64). It is possible that high level of *Acs/1* expression induced by

287 coronavirus infection can directly enhance inflammatory phenotypes of infected  
288 macrophages via remodeling of lipid metabolism. Although inhibiting fatty acid synthesis  
289 was reported to block SARS-CoV-2 replication (65), it is still unclear how coronavirus  
290 infection alters the cellular lipid metabolism, especially the involvement of acyl-CoA  
291 synthetase long-chain family members. As a member of acyl-CoA synthetase long-chain  
292 family member, ACSL1 was recently identified to promote  $\alpha$ -eleostearic acid triggered  
293 ferroptosis. However, the relationship between ferroptosis and inflammatory phenotypes  
294 in coronavirus infected macrophages is still elusive. Apart from macrophages, ACSL1 was  
295 also observed to be highly expressed in neutrophils in fatal sepsis (50). Our *in vivo* data  
296 revealed that ferroptosis inhibition protected mice from MHV infection. The protective  
297 effects may be ACSL1-dependent. Taking the sepsis-like symptoms of COVID-19 patients  
298 into consideration, ACSL1 may serve as an intriguing therapeutic target to restrict cytokine  
299 storm in COVID-19.

300 Upregulation of *Acs/1* was reported to depended on Toll-like receptors and NF- $\kappa$ B. In our  
301 experiments, we evaluated the effects of TLR4 inhibitor TAK-242 and NF- $\kappa$ B inhibitor  
302 JSH-23 on expression of *Acs/1*. We observed that induction of *Acs/1* in MHV infected  
303 macrophages was NF- $\kappa$ B-dependent and TLR4-signaling-independent. Although our  
304 previous study indicated the importance of TLR4 signaling in restricting MHV infection, our  
305 results here showed that in macrophages, *Acs/1* upregulation required NF- $\kappa$ B but not  
306 TLR4 activation. Because *Acs/1* expression also depends on TLR2 and TLR2 deficiency  
307 renders mice more protected from MHV infection (56, 66), we speculate that TLR2  
308 signaling is responsible for MHV induced *Acs/1* expression and plays more important roles

309 than TLR4 signaling in mediating MHV infection. Different from SARS-CoV-2 infection,  
 310 which was reported to downregulate *GPX4* expression, however, MHV infection resulted  
 311 in no significant reduction of *Gpx4* expression, indicating distinct routines of ferroptosis  
 312 occurrence between SARS-CoV-2 and MHV infection.

313 Triacsin C is a pan-acyl-CoA synthetase inhibitor which exerts inhibitory effects on ACSL1,  
 314 ACSL3 and ACSL4. For macrophages infected by MHV, we showed that ACSL1  
 315 constituted the dominant isoform of acyl-CoA synthetase family members. Therefore,  
 316 Triacsin C was considered as the ACSL1-specific inhibitor in our experiments. Two  
 317 independent compound screening studies showed that Triacsin C can be a candidate for  
 318 restricting SARS-CoV-2 infection, further validating the involvement of acyl-CoA  
 319 synthetase family members in coronavirus infection. However, due to the lacking of target  
 320 specificity, it is challenging for Triacsin C to be applied for the inhibition of ACSL1 *in vivo*.

321 Recently, a compound based on Triacsin C showed highly potent and selective inhibitory  
 322 effects on ACSL1 (68). This refined compound may be selected as an ideal inhibitor for  
 323 treatment of coronavirus infection.

324 Collectively, our study provided the implications for focusing on the correlation between  
 325 ferroptosis and inflammation in coronavirus infection. Our findings emphasized the  
 326 importance of acyl-CoA synthetase family members, especially ACSL1 in MHV infection,  
 327 and showed that ferroptosis inhibition offered benefits for individuals suffering coronavirus  
 328 infection.

329

330

331

332 Materials and methods

333

334 Cells

335 RAW 264.7, iBMDM, MEF and 17CL-1 cells were kept in our lab. Mouse alveolar

336 macrophage cell line MH-S cells were from American Type Culture Collection (ATCC).

337 Cells were cultured in Dulbecco's modified eagle medium (DMEM) supplemented with 10%

338 FBS (PAN), 1% glutamine (Gibco), 100 U/ml penicillin and 100 µg/ml streptomycin at 37°C

339 in the incubator ESCO® CCL-170B-8 with the presence of 5% CO<sub>2</sub>.

340

341 Primary macrophages

342 For the isolation of mouse primary peritoneal macrophages (PMs), cells were collected

343 from lavage of the peritoneal cavity from mice that were pre-stimulated with thioglycolate

344 (TG) for 3 days. For the isolation of bone marrow derived macrophages (BMDMs), bone

345 marrow was rinsed out of femurs and tibiae of 6-week-old C57BL6/ mice. Cells were

346 cultured with 30 % L929 cell culture supernatant for 3 days. 3 days later, the supernatant

347 was replaced by fresh cell culture medium with 30% L929 cell culture supernatant and

348 maintained for another 3 days. Mature macrophages were harvested by digesting with

349 trypsin-EDTA for 2 minutes and seeded into 24-well plates for further experiments (200

350 thousand cells per well).

351

352 Murine hepatitis virus culture



353 The murine hepatitis virus A59 strain has been described previously (2). MHV-A59 was  
354 propagated in 17CL-1 cells. Briefly, 0.005 multiplicity of infection (MOI) MHV-A59 was  
355 added to the supernatant of growing cells. The cell debris and supernatants were  
356 collected, resuspended and froze in -80°C freezer 36 hours later. The supernatant was  
357 frozen and thawed for 3 cycles, centrifuged and subpackaged, followed by the  
358 assessment of virus titer via plaque assay.

359

360 Reagents and drugs

361 Ferrostatin-1 (HY-100579) and TAK-242 (HY-11109) were from MedChemExpress.  
362 Liproxstatin-1 (S81156) was from Yuanye Bio-Tech. Triacsin C (T139793) was from  
363 Aladdin. VX-765 (T6090), z-DEVD-FMK (T6005), GSK-872 (T4074), and JSH-23 (T1930)  
364 were from Targetmol.

365

366 Virus infection in cells

367 RAW264.7 cells, PMs and BMDMs were infected by MHV-A59 at indicated MOI. 2 hours  
368 after infection, the supernatant was removed and cells were covered with culture medium  
369 containing compounds at indicated concentration. Infected cells or supernatants were  
370 harvested to perform the further experiments.

371

372 RNA isolation and RT-qPCR

373 Total RNA from infected cells was extracted via one-step method using Trizol reagent  
374 (Invitrogen) and the cDNA was generated using HiScript II Q RT SuperMix (Vazyme).

Quantitative real-time PCR was carried out using ChamQ Universal SYBR qPCR Master Mix (Vazyme) and specific primers on the 7500 Fast Real-Time PCR Instrument (Applied Biosystems). Data were analyzed using GraphPad Prism Version 8.0 (GraphPad Software) according to the  $2^{-\Delta Ct}$  threshold calculation method and means  $\pm$  SD. The relative RNA expression level was normalized to *Hprt* quantified in parallel amplification reactions. Primer sequences were listed as follows:

*mHprt*-F: 5'-TCAGTCAACGGGGGACATAAA-3'

*mHprt*-R: 5'-GGGGCTGTACTGCTTAACCAG-3'

*mIl6*-F: 5'-TCTGCAAGAGACTTCCATCCAGTTGC-3'

*mIl6*-R: 5'-AGCCTCCGACTTGTGAAGTGGT-3'

*mIfnb1*-F: 5'-TCCGAGCAGAGATCTTCAGGAA-3'

*mIfnb1*-R: 5'-GCAACCACCACTCATTCTGAG-3'

*mCxcl10*-F: 5'-CCAAGTGCTGCCGTCATTTTC-3'

*mCxcl10*-R: 5'-GGCTCGCAGGGATGATTTCAA-3'

*mAcs1*-F: 5'-TGCCAGAGCTGATTGACATTC-3'

*mAcs1*-R: 5'-GGCATACCAGAAGGTGGTGAG-3'

MHV-pp-F: 5'-TGCCTGAAACGCATGTTGTG-3'

MHV-pp-R: 5'-CAGACAAACCAGTGTTGGCG-3'

Bulk RNA-seq

Integrity of RNA purified from indicated BMDM or PM samples was assessed using the

RNA Nano 6000 Assay Kit of the Agilent Bioanalyzer 2100 system (Agilent Technologies).

397 All samples showed RNA integrity number > 8. RNA sequencing libraries were generated  
398 using NEBNext Ultra Directional RNA Library Prep Kit for Illumina (NEB), and sequenced  
399 on an Illumina Novaseq PE150 platform. Sequencing was performed at Genewiz Co. Ltd.  
400 The filtered reads were mapped to the mouse genome reference sequence  
401 (GRCm38/mm10 Ensembl release 81) using HISAT2. Gene expression was quantified as  
402 fragments per kilobase of coding sequence per million reads (FPKM) algorithm. Genes  
403 were ranked by log2 of fold change (log2FC) and -log10 of false discovery rate  
404 (-log10(FDR)). For the gene ontology analysis, top upregulated genes were uploaded to  
405 DAVID Bioinformatics Resources 6.8 to perform Gene Ontology (GO) analysis. Top  
406 enriched items ( $p < 0.05$ ) were shown in the figure, as described in the legend of figure 4.

407

#### 408 PI staining

409 Real-time cell membrane permeability assessment was carried out using PI staining. Live  
410 cells were covered by cell culture medium with 20  $\mu$ M PI. Cells were cultured for 15 min  
411 followed by washing with PBS for 2 times. Then cells were covered with culture medium  
412 and monitored under fluorescence microscope.

413

#### 414 Cell imaging

415 For the imaging under bright field alone, cells were monitored using CytoSMART Lux2 cell  
416 imaging system (CytoSMART). Extent of syncytia formation was determined with cell  
417 confluence level, which was calculated in CytoSMART website. For the imaging of cells  
418 stained with PI, cells were monitored using Olympus IX70 Fluorescence Microscope

419 (Olympus).

420

421 Cytokine measurement and LDH assay

422 For the detection of cytokine abundance in the cell culture supernatant, supernatants from

423 treated cells were collected to perform ELISA following the manufacturer's instructions.

424 The following ELISA kits was used: mouse IL-6 ELISA kit (Dakewei). LDH was measured

425 via colorimetric NAD linked assay using LDH detection kit (Leagene).

426

427 Plaque assay

428 Virus yield of MHV-A59 in culture supernatants was determined by plaque assay with

429 17CL-1 cells. Culture supernatant was harvested and diluted to infect confluent 17CL-1

430 cells cultured in 24-well plates. Viruses were removed 2 hours after infection and cells

431 were washed with pre-warmed PBS followed by culture with DMEM containing 0.5%

432 methylcellulose. After 36 hours of infection, the overlay was removed and cells were fixed

433 with 4% paraformaldehyde for 10 min and stained with 1% crystal violet for 20 min.

434 Plaques were counted, averaged, and multiplied by the dilution factor to determine the

435 viral titer as plaque-forming units per mL (PFU/mL).

436

437 Animal model

438 All mice were bred and maintained in specific pathogen-free (SPF) conditions with

439 approval by the Peking University animal care and use committee. For the infection

440 experiments, 4-week-old C57BL/6 male mice were anesthetized via inhaling isoflurane

441 and then inoculated intranasally (i.n.) with 10  $\mu$ L of MHV-A59 virus at  $1 \times 10^4$  PFU. Mice  
442 were intranasally treated daily with Lip-1 or vehicle alone from day 1 to day 10 post  
443 infection or mock infection. We monitored the weight of each mouse every day until mice  
444 were sacrificed. Mice were sacrificed at day 4 or day 18 post infection or mock infection to  
445 evaluate the tissue injury and inflammation caused by MHV-A59 infection.

446

#### 447 Histology

448 Mice were sacrificed at indicated time points after infection. Lungs from each group were  
449 fixed with 4% paraformaldehyde, embedded in paraffin and cut into sections of 3.5  $\mu$ m,  
450 and further stained with hematoxylin and eosin (HE). Immune cells infiltration and  
451 hemorrhages were determined and evaluated under light microscopy. The images were  
452 taken by Leica DM 6B microscope.

453

#### 454 Statistical analysis

455 Results were analyzed by paired or unpaired Student's *t*-test or by two-way ANOVA  
456 analysis (for determining the differences in the weight loss curves). GraphPad Prism 8.0  
457 was used for statistical analysis and graphing. Data was shown as mean  $\pm$  SD unless  
458 indicated in the legend. Statistical values can be found in the figure legends. \**p* < 0.05, \*\**p*  
459 < 0.01, \*\*\*\**p* < 0.0001. For experiments *in vivo*, *n* = number of individual animals.

460

461

462

463 Figure legends

464

465 Figure 1. Ferroptosis inhibitor Fer-1 inhibited MHV-A59 induced syncytia and membrane  
466 damage.

467 (A and B) Primary peritoneal macrophages (PMs) were infected with MHV-A59 at 0.05  
468 MOI. After 2 hours of infection, cells were treated with Fer-1 (10  $\mu$ M). After 24 hours of  
469 infection, cells were imaged using CytoSMART system (A) and cell confluence was  
470 evaluated using the CytoSMART website (B). (C) PMs were infected as described in (A)  
471 and were stained with propidium iodide (PI). After staining cells were imaged under  
472 fluorescence microscope. (D) PMs were infected as described in (A), followed by the  
473 treatment with Fer-1 (10  $\mu$ M), z-DEVD-FMK (25  $\mu$ M), VX-765 (30  $\mu$ M) or GSK-872 (10  $\mu$ M).  
474 Cells were stained with PI and imaged under fluorescence microscope. (E) Scale bars:  
475 For (A) and (C), 200  $\mu$ m. For (D), 100  $\mu$ m. Data from two independent experiments was  
476 shown. \*,  $p < 0.05$ ; Student's *t*-test. See also Video S1.

477

478 Figure 2. Fer-1 inhibited MHV-A59 propagation and infection induced inflammatory  
479 cytokine and LDH release.

480 (A) PMs or BMDMs were infected with MHV-A59 at 0.05 MOI for 24 hours. Fer-1 was  
481 added after 2 hours of infection. MHV abundance was evaluated by the expression of  
482 MHV polyprotein (MHV-pp). MHV-pp expression was tested by qRT-PCR. (B) Viral load of  
483 MHV-A59 from supernatants of PMs from (A) was evaluated with plaque assay. (C and D)  
484 Expression of *Il6*, *Cxcl10* and *Ifnb1* after MHV infection in PMs (C) or BMDMs (D) with or

without Fer-1 treatment was tested by qRT-PCR. (E) IL-6 abundance from supernatants of PMs from (C) was tested with ELISA. (F) Percentage of LDH release of PMs from (C) was tested by LDH detection kit. Data from two independent experiments was shown. \*\*,  $p < 0.01$ ; \*\*\*\*,  $p < 0.0001$ ; Student's t-test. NS, not significant. See also Figure S1.

489

Figure 3. Lip-1 alleviated MHV induced lung tissue injury.

(A) Diagram of MHV-A59 infection model. 4-week-old male C57BL/6 mice were infected intranasally (i.n.) with  $1 \times 10^5$  PFU MHV-A59 in 10  $\mu$ L DMEM. Lip-1 (10 mg/kg) was inhaled daily from day 1 to day 10 post infection. Mice were sacrificed at day 4 post infection and lung tissues were collected and processed to perform HE staining. Remained mice were sacrificed at day 18 post infection, which was the end point of the infection model. Lung tissues were collected, photographed and processed to perform HE staining. Body weight changes of mice was monitored through the entire infection period. (B) Photograph of lung tissues collected at day 18 post infection. Black arrows indicated obvious hemorrhagic alterations. (C) HE staining of lung tissues collected at day 4 post infection. Black arrows indicated obvious hemorrhagic alterations. Black asterisks indicated immune cells infiltration. (D) HE staining of lung tissues collected at day 18 post infection. See also in Figure S2.

503

Figure 4. MHV-A59 infection upregulated NF- $\kappa$ B dependent *Acs1* expression.

(A and B) BMDMs were infected by MHV-A59 at 0.1 MOI for 12 hours and RNA was isolated to perform bulk RNA-seq. Top upregulated genes were uploaded to DAVID

507 Bioinformatics Resources 6.8 to perform Gene Ontology analysis. Top enriched items ( $p <$   
508 0.05) were shown in (A). Expression changes of all genes (MHV infected versus control  
509 cells) was shown in (B), ranked by log2 fold change (log2FC) and  $-\log_{10}$ (false discovery  
510 rate) ( $-\log_{10}$ (FDR)). Dot of *Acs1* was marked with red. (C) Expression of acyl-CoA  
511 synthetase long-chain family members from (A) was compared via qRT-PCR. (D)  
512 Expression changes of all genes from BMDMs after MHV infection was shown. Dot of  
513 *Acs1* was marked with red. (E) Expression of *Ptgs2* in (D) was shown. (F) Expression of  
514 *Acs1* after MHV-A59 infection in various cell lines was tested. (G and H) Impacts of  
515 TAK-242 (1  $\mu$ M) (G) or JSH-23 (20  $\mu$ M) (H) on the expression of *Acs1* after MHV-A59  
516 infection in PMs. Data from two independent experiments was shown. \*,  $p < 0.05$ ; \*\*,  $p <$   
517 0.01; Student's *t*-test.

518

519 Figure 5. Triacsin C inhibited MHV propagation and infection induced syncytia formation.  
520 (A and B) Viral load of MHV-A59 from supernatants of PMs (A) or BMDMs (B) after Lip-1  
521 (10  $\mu$ M) or Triacsin C (2  $\mu$ M) treatment. (C and D) Expression of *Il6*, *Cxcl10* and *Ifnb1* after  
522 MHV infection in PMs (C) or BMDMs (D) after Fer-1 (10  $\mu$ M) or Triacsin C (2  $\mu$ M)  
523 treatment was tested by qRT-PCR. (E and F) PMs were infected by MHV-A59 followed by  
524 treatment with Fer-1 (10  $\mu$ M) or Triacsin C (2  $\mu$ M). After 24 hours of infection, PMs were  
525 imaged using CytoSMART system (E) and cell confluence was evaluated using the  
526 CytoSMART website (F). Scale bars: 200  $\mu$ m. Data from two independent experiments  
527 was shown. \*,  $p < 0.05$ ; \*\*,  $p < 0.01$ ; Student's *t*-test. See also Figure S3.

528



529 Figure S1. Fer-1 does not inhibit viral entry of MHV-A59.

530 Referring to Figure 2. PMs were pre-treated with Fer-1 (10  $\mu$ M) for 2 hours and infected  
531 with MHV-A59 at 1 MOI for 2 hours. Expression of MHV-pp was tested by qRT-PCR. NS,  
532 not significant.

533

534 Figure S2. Lip-1 was not able to reverse reduced gain of body weights in low-dose  
535 MHV-A59 infection model.

536 Referring to Figure 3. Body weight changes were monitored daily. Apparent restriction of  
537 gain of body weight compared with non-infected group was observed after MHV-A59  
538 infection. Data was shown as means  $\pm$  SEM. \*\*,  $p < 0.01$ ; Student's  $t$ -test. NS, not  
539 significant.

540

541 Figure S3. RAW 264.7 cells were not protected from ferroptosis inhibition after MHV-A59  
542 infection.

543 (A) RAW 264.7 cells were infected with MHV-A59 at 0.05 MOI for 24 hours, stained with  
544 PI and imaged under fluorescence microscope. RAW 264.7 cells showed no obvious  
545 membrane permeability alterations after MHV-A59 infection.

546 (B and C) RAW 264.7 cells were infected with MHV-A59 at 0.05 MOI for 24 hours.  
547 Expression of *Irfn1* (B) and MHV-pp (C) was tested by qRT-PCR.

548 (D) Viral load of MHV-A59 from supernatants of RAW 264.7 cells with or without Fer-1 (10  
549  $\mu$ M) treatment. NS, not significant.

550

551 Figure S4. Triacsin C inhibited MHV induced syncytia formation in BMDM.

552 Referring to Figure 5. Impacts of Fer-1 (10  $\mu$ M) or Triacsin C (2  $\mu$ M) on syncytia formation  
553 of BMDMs after MHV-A59 infection. Black arrows indicated cell syncytia.

554

555 Video S1. MHV-A59 infection induced ferroptosis-like morphological changes of murine  
556 peritoneal macrophages

557 Referring to Figure 1. PMs were infected with MHV-A59 at 0.1 MOI. Cell morphology was  
558 monitored under CytoSMART Live Cell Imaging System for 24 hours.

559

560

561

562 Acknowledgments

563 We thank Dr. Zhao Yingchi for help refining the viral propagation experiments. This work  
564 was supported by the National Key Research and Development Program of China  
565 (2016YFA0500300; 2020YFA0707800), the National Natural Science Foundation of  
566 China (31570891; 31872736; 32022028; 81991505), Peking University Clinical+X  
567 (PKU2020LCXQ009), the Peking University Medicine Fund (PKU2020LCXQ009).

568

569 Author contributions

570 F.Y. and Z.Z. designed the research; X.H. and Z.Z. performed the experiments and  
571 analyzed data; F.Y. supervised the study; Z.Z., X.H. and F.Y. interpreted data and wrote  
572 the manuscript. All authors commented on the manuscript.

573

574 Competing interests

575 The authors declare that they have no competing interests.

576

577 Data and materials availability

578 The raw data of RNA sequencing in this publication has been deposited in NCBI's Gene

579 Expression Omnibus and are accessible through GEO Series accession numbers

580 GSE185800.

581

582 Abbreviations

583 Murine hepatitis virus strain A59, MHV-A59; damage-associated molecular pattern

584 molecule, DAMP; coronavirus disease 2019, COVID-19; reactive oxygen species, ROS;

585 new castle virus, NDV; bone marrow derived macrophage, BMDM; peritoneal

586 macrophages, PMs; ferrostatin-1, Fer-1; liproxstatin-1, Lip-1.

587

588

589

590 References

591 [1] Lavi E, Gilden DH, Wroblewska Z, Rorke LB and Weiss SR. Experimental

592 demyelination produced by the A59 strain of mouse hepatitis virus. *Neurology*. 1984,

593 34(5): 597-603

594 [2] Yang Z, Du J, Chen G, Zhao J, Yang X, Su L, Cheng G and Tang H. Coronavirus

595 MHV-A59 infects the lung and causes severe pneumonia in C57BL/6 mice. *Virology*. 2014,  
596 29(6): 393-402

597 [3] Ryu S, Shchukina I, Youm YH, Qing H, Hilliard B, Dlugos T, Zhang X, Yasumoto Y,  
598 Booth CJ, Fernández-Hernando C, Suárez Y, Khanna K, Horvath TL, Dietrich MO,  
599 Artyomov M, Wang A and Dixit VD. Ketogenic diet restrains aging-induced exacerbation  
600 of coronavirus infection in mice. *Elife*. 2021, 10:

601 [4] Guo Q, Zhao Y, Li J, Liu J, Yang X, Guo X, Kuang M, Xia H, Zhang Z, Cao L, Luo Y,  
602 Bao L, Wang X, Wei X, Deng W, Wang N, Chen L, Chen J, Zhu H, Gao R, Qin C, Wang X  
603 and You F. Induction of alarmin S100A8/A9 mediates activation of aberrant neutrophils in  
604 the pathogenesis of COVID-19. *Cell Host Microbe*. 2021, 29(2): 222-235.e224

605 [5] Dixon SJ, Lemberg KM, Lamprecht MR, Skouta R, Zaitsev EM, Gleason CE, Patel DN,  
606 Bauer AJ, Cantley AM, Yang WS, Morrison B, 3rd and Stockwell BR. Ferroptosis: an  
607 iron-dependent form of nonapoptotic cell death. *Cell*. 2012, 149(5): 1060-1072

608 [6] Yang WS, Kim KJ, Gaschler MM, Patel M, Shchepinov MS and Stockwell BR.  
609 Peroxidation of polyunsaturated fatty acids by lipoxygenases drives ferroptosis. *Proc Natl*  
610 *Acad Sci U S A*. 2016, 113(34): E4966-4975

611 [7] Wenzel SE, Tyurina YY, Zhao J, St Croix CM, Dar HH, Mao G, Tyurin VA,  
612 Anthymuthu TS, Kapralov AA, Amoscato AA, Mikulska-Ruminska K, Shrivastava IH,  
613 Kenny EM, Yang Q, Rosenbaum JC, Sparvero LJ, Emler DR, Wen X, Minami Y, Qu F,  
614 Watkins SC, Holman TR, VanDemark AP, Kellum JA, Bahar I, Bayir H and Kagan VE.  
615 PEBP1 Wards Ferroptosis by Enabling Lipoxygenase Generation of Lipid Death  
616 Signals. *Cell*. 2017, 171(3): 628-641.e626

617 [8] Friedmann Angeli JP, Schneider M, Proneth B, Tyurina YY, Tyurin VA, Hammond VJ,  
618 Herbach N, Aichler M, Walch A, Eggenhofer E, Basavarajappa D, Rådmark O, Kobayashi  
619 S, Seibt T, Beck H, Neff F, Esposito I, Wanke R, Förster H, Yefremova O, Heinrichmeyer  
620 M, Bornkamm GW, Geissler EK, Thomas SB, Stockwell BR, O'Donnell VB, Kagan VE,  
621 Schick JA and Conrad M. Inactivation of the ferroptosis regulator Gpx4 triggers acute  
622 renal failure in mice. *Nat Cell Biol.* 2014, 16(12): 1180-1191

623 [9] Bersuker K, Hendricks JM, Li Z, Magtanong L, Ford B, Tang PH, Roberts MA, Tong B,  
624 Maimone TJ, Zoncu R, Bassik MC, Nomura DK, Dixon SJ and Olzmann JA. The CoQ  
625 oxidoreductase FSP1 acts parallel to GPX4 to inhibit ferroptosis. *Nature.* 2019, 575(7784):  
626 688-692

627 [10] Doll S, Freitas FP, Shah R, Aldrovandi M, da Silva MC, Ingold I, Goya Grocin A,  
628 Xavier da Silva TN, Panzilius E, Scheel CH, Mourão A, Buday K, Sato M, Wanninger J,  
629 Vignane T, Mohana V, Rehberg M, Flatley A, Schepers A, Kurz A, White D, Sauer M,  
630 Sattler M, Tate EW, Schmitz W, Schulze A, O'Donnell V, Proneth B, Popowicz GM, Pratt  
631 DA, Angeli JPF and Conrad M. FSP1 is a glutathione-independent ferroptosis suppressor.  
632 *Nature.* 2019, 575(7784): 693-698

633 [11] Dixon SJ, Patel DN, Welsch M, Skouta R, Lee ED, Hayano M, Thomas AG, Gleason  
634 CE, Tatonetti NP, Slusher BS and Stockwell BR. Pharmacological inhibition of  
635 cystine-glutamate exchange induces endoplasmic reticulum stress and ferroptosis. *Elife.*  
636 2014, 3: e02523

637 [12] Doll S, Proneth B, Tyurina YY, Panzilius E, Kobayashi S, Ingold I, Irmeler M, Beckers J,  
638 Aichler M, Walch A, Prokisch H, Trümbach D, Mao G, Qu F, Bayir H, Füllekrug J, Scheel

639 CH, Wurst W, Schick JA, Kagan VE, Angeli JP and Conrad M. ACSL4 dictates ferroptosis  
640 sensitivity by shaping cellular lipid composition. *Nat Chem Biol.* 2017, 13(1): 91-98

641 [13] Kagan VE, Mao G, Qu F, Angeli JP, Doll S, Croix CS, Dar HH, Liu B, Tyurin VA, Ritov  
642 VB, Kapralov AA, Amoscato AA, Jiang J, Anthonymuthu T, Mohammadyani D, Yang Q,  
643 Proneth B, Klein-Seetharaman J, Watkins S, Bahar I, Greenberger J, Mallampalli RK,  
644 Stockwell BR, Tyurina YY, Conrad M and Bayır H. Oxidized arachidonic and adrenic PEs  
645 navigate cells to ferroptosis. *Nat Chem Biol.* 2017, 13(1): 81-90

646 [14] Yuan H, Li X, Zhang X, Kang R and Tang D. Identification of ACSL4 as a biomarker  
647 and contributor of ferroptosis. *Biochem Biophys Res Commun.* 2016, 478(3): 1338-1343

648 [15] Beatty A, Singh T, Tyurina YY, Tyurin VA, Samovich S, Nicolas E, Maslar K, Zhou Y,  
649 Cai KQ, Tan Y, Doll S, Conrad M, Subramanian A, Bayır H, Kagan VE, Rennefahrt U and  
650 Peterson JR. Ferroptotic cell death triggered by conjugated linolenic acids is mediated by  
651 ACSL1. *Nat Commun.* 2021, 12(1): 2244

652 [16] Al-Rashed F, Thomas R, Al-Roub A, Al-Mulla F and Ahmad R. LPS Induces GM-CSF  
653 Production by Breast Cancer MDA-MB-231 Cells via Long-Chain Acyl-CoA Synthetase 1.  
654 *Molecules.* 2020, 25(20):

655 [17] Jorgensen I, Rayamajhi M and Miao EA. Programmed cell death as a defence against  
656 infection. *Nat Rev Immunol.* 2017, 17(3): 151-164

657 [18] Karki R, Sharma BR, Tuladhar S, Williams EP, Zalduondo L, Samir P, Zheng M,  
658 Sundaram B, Banoth B, Malireddi RKS, Schreiner P, Neale G, Vogel P, Webby R,  
659 Jonsson CB and Kanneganti TD. Synergism of TNF- $\alpha$  and IFN- $\gamma$  Triggers Inflammatory  
660 Cell Death, Tissue Damage, and Mortality in SARS-CoV-2 Infection and Cytokine Shock

661 Syndromes. *Cell*. 2021, 184(1): 149-168.e117

662 [19] Zheng M, Williams EP, Malireddi RKS, Karki R, Banoth B, Burton A, Webby R,  
663 Channappanavar R, Jonsson CB and Kanneganti TD. Impaired NLRP3 inflammasome  
664 activation/pyroptosis leads to robust inflammatory cell death via caspase-8/RIPK3 during  
665 coronavirus infection. *J Biol Chem*. 2020, 295(41): 14040-14052

666 [20] Li S, Zhang Y, Guan Z, Li H, Ye M, Chen X, Shen J, Zhou Y, Shi ZL, Zhou P and  
667 Peng K. SARS-CoV-2 triggers inflammatory responses and cell death through caspase-8  
668 activation. *Signal Transduct Target Ther*. 2020, 5(1): 235

669 [21] Ferreira AC, Soares VC, de Azevedo-Quintanilha IG, Dias S, Fintelman-Rodrigues N,  
670 Sacramento CQ, Mattos M, de Freitas CS, Temerozo JR, Teixeira L, Damaceno Hottz E,  
671 Barreto EA, Pão CRR, Palhinha L, Miranda M, Bou-Habib DC, Bozza FA, Bozza PT and  
672 Souza TML. SARS-CoV-2 engages inflammasome and pyroptosis in human primary  
673 monocytes. *Cell Death Discov*. 2021, 7(1): 43

674 [22] Ma H, Zhu Z, Lin H, Wang S, Zhang P, Li Y, Li L, Wang J, Zhao Y and Han J.  
675 Pyroptosis of syncytia formed by fusion of SARS-CoV-2 spike and ACE2-expressing cells.  
676 *Cell Discov*. 2021, 7(1): 73

677 [23] Kan X, Yin Y, Song C, Tan L, Qiu X, Liao Y, Liu W, Meng S, Sun Y and Ding C.  
678 Newcastle-disease-virus-induced ferroptosis through nutrient deprivation and  
679 ferritinophagy in tumor cells. *iScience*. 2021, 24(8): 102837

680 [24] Armitage AE, Stacey AR, Giannoulatou E, Marshall E, Sturges P, Chatha K, Smith  
681 NM, Huang X, Xu X, Pasricha SR, Li N, Wu H, Webster C, Prentice AM, Pellegrino P,  
682 Williams I, Norris PJ, Drakesmith H and Borrow P. Distinct patterns of hepcidin and iron

683 regulation during HIV-1, HBV, and HCV infections. *Proc Natl Acad Sci U S A.* 2014,  
684 111(33): 12187-12192

685 [25] Chow JK, Werner BG, Ruthazer R and Snyderman DR. Increased serum iron levels  
686 and infectious complications after liver transplantation. *Clin Infect Dis.* 2010, 51(3): e16-23

687 [26] Jia M, Qin D, Zhao C, Chai L, Yu Z, Wang W, Tong L, Lv L, Wang Y, Rehwinkel J, Yu  
688 J and Zhao W. Redox homeostasis maintained by GPX4 facilitates STING activation. *Nat*  
689 *Immunol.* 2020, 21(7): 727-735

690 [27] Li P, Jiang M, Li K, Li H, Zhou Y, Xiao X, Xu Y, Krishfield S, Lipsky PE, Tsokos GC  
691 and Zhang X. Glutathione peroxidase 4-regulated neutrophil ferroptosis induces systemic  
692 autoimmunity. *Nat Immunol.* 2021, 22(9): 1107-1117

693 [28] Yao Y, Chen Z, Zhang H, Chen C, Zeng M, Yunis J, Wei Y, Wan Y, Wang N, Zhou M,  
694 Qiu C, Zeng Q, Ong HS, Wang H, Makota FV, Yang Y, Yang Z, Wang N, Deng J, Shen C,  
695 Xia Y, Yuan L, Lian Z, Deng Y, Guo C, Huang A, Zhou P, Shi H, Zhang W, Yi H, Li D, Xia  
696 M, Fu J, Wu N, de Haan JB, Shen N, Zhang W, Liu Z and Yu D. Selenium-GPX4 axis  
697 protects follicular helper T cells from ferroptosis. *Nat Immunol.* 2021, 22(9): 1127-1139

698 [29] Wen Q, Liu J, Kang R, Zhou B and Tang D. The release and activity of HMGB1 in  
699 ferroptosis. *Biochem Biophys Res Commun.* 2019, 510(2): 278-283

700 [30] Liu Y, Wang Y, Liu J, Kang R and Tang D. The circadian clock protects against  
701 ferroptosis-induced sterile inflammation. *Biochem Biophys Res Commun.* 2020, 525(3):  
702 620-625

703 [31] Huang L, Shi Y, Gong B, Jiang L, Zhang Z, Liu X, Yang J, He Y, Jiang Z, Zhong L,  
704 Tang J, You C, Jiang Q, Long B, Zeng T, Luo M, Zeng F, Zeng F, Wang S, Yang X and



705 Yang Z. Dynamic blood single-cell immune responses in patients with COVID-19. Signal  
706 Transduct Target Ther. 2021, 6(1): 110

707 [32] Girelli D, Marchi G, Busti F and Vianello A. Iron metabolism in infections: Focus on  
708 COVID-19. Semin Hematol. 2021, 58(3): 182-187

709 [33] Yang M and Lai CL. SARS-CoV-2 infection: can ferroptosis be a potential treatment  
710 target for multiple organ involvement? Cell Death Discov. 2020, 6: 130

711 [34] Zhao K, Huang J, Dai D, Feng Y, Liu L and Nie S. Serum Iron Level as a Potential  
712 Predictor of Coronavirus Disease 2019 Severity and Mortality: A Retrospective Study.  
713 Open Forum Infect Dis. 2020, 7(7): ofaa250

714 [35] Chakurkar V, Rajapurkar M, Lele S, Mukhopadhyay B, Lobo V, Injarapu R, Sheikh M,  
715 Dholu B, Ghosh A and Jha V. Increased serum catalytic iron may mediate tissue injury  
716 and death in patients with COVID-19. Sci Rep. 2021, 11(1): 19618

717 [36] Wang Y, Huang J, Sun Y, Stubbs D, He J, Li W, Wang F, Liu Z, Ruzicka JA, Taylor  
718 EW, Rayman MP, Wan X and Zhang J. SARS-CoV-2 suppresses mRNA expression of  
719 selenoproteins associated with ferroptosis, endoplasmic reticulum stress and DNA  
720 synthesis. Food Chem Toxicol. 2021, 153: 112286

721 [37] Buchrieser J, Dufloo J, Hubert M, Monel B, Planas D, Rajah MM, Planchais C, Porrot  
722 F, Guivel-Benhassine F, Van der Werf S, Casartelli N, Mouquet H, Bruel T and Schwartz  
723 O. Syncytia formation by SARS-CoV-2-infected cells. Embo j. 2020, 39(23): e106267

724 [38] Sanders DW, Jumper CC, Ackerman PJ, Bracha D, Donlic A, Kim H, Kenney D,  
725 Castello-Serrano I, Suzuki S, Tamura T, Tavares AH, Saeed M, Holehouse AS, Ploss A,  
726 Levental I, Douam F, Padera RF, Levy BD and Brangwynne CP. SARS-CoV-2 requires

cholesterol for viral entry and pathological syncytia formation. *Elife*. 2021, 10:

[39] Daniloski Z, Jordan TX, Wessels HH, Hoagland DA, Kasela S, Legut M, Maniatis S, Mimitou EP, Lu L, Geller E, Danziger O, Rosenberg BR, Phatnani H, Smibert P, Lappalainen T, tenOever BR and Sanjana NE. Identification of Required Host Factors for SARS-CoV-2 Infection in Human Cells. *Cell*. 2021, 184(1): 92-105.e116

[40] Lamers MM, Beumer J, van der Vaart J, Knoop K, Puschhof J, Breugem TI, Ravelli RBG, Paul van Schayck J, Mykytyn AZ, Duimel HQ, van Donselaar E, Riesebosch S, Kuijpers HJH, Schipper D, van de Wetering WJ, de Graaf M, Koopmans M, Cuppen E, Peters PJ, Haagmans BL and Clevers H. SARS-CoV-2 productively infects human gut enterocytes. *Science*. 2020, 369(6499): 50-54

[41] Grant RA, Morales-Nebreda L, Markov NS, Swaminathan S, Querrey M, Guzman ER, Abbott DA, Donnelly HK, Donayre A, Goldberg IA, Klug ZM, Borkowski N, Lu Z, Kihshen H, Politanska Y, Sichizya L, Kang M, Shilatifard A, Qi C, Lomasney JW, Argento AC, Kruser JM, Malsin ES, Pickens CO, Smith SB, Walter JM, Pawlowski AE, Schneider D, Nannapaneni P, Abdala-Valencia H, Bharat A, Gottardi CJ, Budinger GRS, Misharin AV, Singer BD and Wunderink RG. Circuits between infected macrophages and T cells in SARS-CoV-2 pneumonia. *Nature*. 2021, 590(7847): 635-641

[42] Williams RK, Jiang GS and Holmes KV. Receptor for mouse hepatitis virus is a member of the carcinoembryonic antigen family of glycoproteins. *Proc Natl Acad Sci U S A*. 1991, 88(13): 5533-5536

[43] Cantuti-Castelvetri L, Ojha R, Pedro LD, Djannatian M, Franz J, Kuivanen S, van der Meer F, Kallio K, Kaya T, Anastasina M, Smura T, Levanov L, Szirovicza L, Tobi A,

749 Kallio-Kokko H, Österlund P, Joensuu M, Meunier FA, Butcher SJ, Winkler MS,  
750 Mollenhauer B, Helenius A, Gokce O, Teesalu T, Hepojoki J, Vapalahti O, Stadelmann C,  
751 Balistreri G and Simons M. Neuropilin-1 facilitates SARS-CoV-2 cell entry and infectivity.  
752 Science. 2020, 370(6518): 856-860

753 [44] Daly JL, Simonetti B, Klein K, Chen KE, Williamson MK, Antón-Plágaro C, Shoemark  
754 DK, Simón-Gracia L, Bauer M, Hollandi R, Greber UF, Horvath P, Sessions RB, Helenius  
755 A, Hiscox JA, Teesalu T, Matthews DA, Davidson AD, Collins BM, Cullen PJ and  
756 Yamauchi Y. Neuropilin-1 is a host factor for SARS-CoV-2 infection. Science. 2020,  
757 370(6518): 861-865

758 [45] Gao J, Mei H, Sun J, Li H, Huang Y, Tang Y, Duan L, Liu D, Wang Q, Gao Y, Song K,  
759 Zhao J, Zhang C and Liu J. Neuropilin-1 Mediates SARS-CoV-2 Infection in Bone  
760 Marrow-derived Macrophages. bioRxiv. 2021: 2021.2004.2014.439793

761 [46] Zilka O, Shah R, Li B, Friedmann Angeli JP, Griesser M, Conrad M and Pratt DA. On  
762 the Mechanism of Cytoprotection by Ferrostatin-1 and Liproxstatin-1 and the Role of Lipid  
763 Peroxidation in Ferroptotic Cell Death. ACS Cent Sci. 2017, 3(3): 232-243

764 [47] Miotto G, Rossetto M, Di Paolo ML, Orian L, Venerando R, Roveri A, Vučković AM,  
765 Bosello Travain V, Zaccarin M, Zennaro L, Maiorino M, Toppo S, Ursini F and Cozza G.  
766 Insight into the mechanism of ferroptosis inhibition by ferrostatin-1. Redox Biol. 2020, 28:  
767 101328

768 [48] Chen X, Kang R, Kroemer G and Tang D. Ferroptosis in infection, inflammation, and  
769 immunity. Journal of Experimental Medicine. 2021, 218(6):

770 [49] Li Q, Han X, Lan X, Gao Y, Wan J, Durham F, Cheng T, Yang J, Wang Z, Jiang C,

771 Ying M, Koehler RC, Stockwell BR and Wang J. Inhibition of neuronal ferroptosis protects  
772 hemorrhagic brain. JCI Insight. 2017, 2(7): e90777

773 [50] Roelands J, Garand M, Hinchcliff E, Ma Y, Shah P, Toufiq M, Alfaki M, Hendrickx W,  
774 Boughorbel S, Rinchai D, Jazaeri A, Bedognetti D and Chaussabel D. Long-Chain  
775 Acyl-CoA Synthetase 1 Role in Sepsis and Immunity: Perspectives From a Parallel  
776 Review of Public Transcriptome Datasets and of the Literature. Front Immunol. 2019, 10:  
777 2410

778 [51] Rubinow KB, Wall VZ, Nelson J, Mar D, Bomsztyk K, Askari B, Lai MA, Smith KD,  
779 Han MS, Vivekanandan-Giri A, Pennathur S, Albert CJ, Ford DA, Davis RJ and Bornfeldt  
780 KE. Acyl-CoA synthetase 1 is induced by Gram-negative bacteria and lipopolysaccharide  
781 and is required for phospholipid turnover in stimulated macrophages. J Biol Chem. 2013,  
782 288(14): 9957-9970

783 [52] Huang YL, Morales-Rosado J, Ray J, Myers TG, Kho T, Lu M and Munford RS.  
784 Toll-like receptor agonists promote prolonged triglyceride storage in macrophages. J Biol  
785 Chem. 2014, 289(5): 3001-3012

786 [53] Yang G, Wang Y, Feng J, Liu Y, Wang T, Zhao M, Ye L and Zhang X. Aspirin  
787 suppresses the abnormal lipid metabolism in liver cancer cells via disrupting an  
788 NFkB-ACSL1 signaling. Biochem Biophys Res Commun. 2017, 486(3): 827-832

789 [54] Santos-Beneit F, Raškevičius V, Skeberdis VA and Bordel S. A metabolic modeling  
790 approach reveals promising therapeutic targets and antiviral drugs to combat COVID-19.  
791 Sci Rep. 2021, 11(1): 11982

792 [55] Williams CG, Jureka AS, Silvas JA, Nicolini AM, Chvatal SA, Carlson-Stevermer J,

793 Oki J, Holden K and Basler CF. Inhibitors of VPS34 and fatty-acid metabolism suppress  
794 SARS-CoV-2 replication. *Cell Rep.* 2021, 36(5): 109479

795 [56] Ren G, Bhatnagar S, Hahn DJ and Kim JA. Long-chain acyl-CoA synthetase-1  
796 mediates the palmitic acid-induced inflammatory response in human aortic endothelial  
797 cells. *Am J Physiol Endocrinol Metab.* 2020, 319(5): E893-e903

798 [57] Li X, Wang TX, Huang X, Li Y, Sun T, Zang S, Guan KL, Xiong Y, Liu J and Yuan HX.  
799 Targeting ferroptosis alleviates methionine-choline deficient (MCD)-diet induced NASH by  
800 suppressing liver lipotoxicity. *Liver Int.* 2020, 40(6): 1378-1394

801 [58] Li N, Wang W, Zhou H, Wu Q, Duan M, Liu C, Wu H, Deng W, Shen D and Tang Q.  
802 Ferritinophagy-mediated ferroptosis is involved in sepsis-induced cardiac injury. *Free*  
803 *Radic Biol Med.* 2020, 160: 303-318

804 [59] Matsushita M, Freigang S, Schneider C, Conrad M, Bornkamm GW and Kopf M. T  
805 cell lipid peroxidation induces ferroptosis and prevents immunity to infection. *J Exp Med.*  
806 2015, 212(4): 555-568

807 [60] Amaral EP, Costa DL, Namasivayam S, Riteau N, Kamenyeva O, Mittereder L,  
808 Mayer-Barber KD, Andrade BB and Sher A. A major role for ferroptosis in Mycobacterium  
809 tuberculosis-induced cell death and tissue necrosis. *J Exp Med.* 2019, 216(3): 556-570

810 [61] Bartolini D, Stabile AM, Bastianelli S, Giustarini D, Pierucci S, Busti C, Vacca C,  
811 Gidari A, Francisci D, Castronari R, Mencacci A, Di Cristina M, Focaia R, Sabbatini S,  
812 Rende M, Gioiello A, Cruciani G, Rossi R and Galli F. SARS-CoV2 infection impairs the  
813 metabolism and redox function of cellular glutathione. *Redox Biol.* 2021, 45: 102041

814 [62] Ibrahim H, Perl A, Smith D, Lewis T, Kon Z, Goldenberg R, Yarta K, Staniloae C and

815 Williams M. Therapeutic blockade of inflammation in severe COVID-19 infection with  
816 intravenous N-acetylcysteine. Clin Immunol. 2020, 219: 108544

817 [63] de Alencar JCG, Moreira CL, Müller AD, Chaves CE, Fukuhara MA, da Silva EA,  
818 Miyamoto MFS, Pinto VB, Bueno CG, Lazar Neto F, Gomez Gomez LM, Menezes MCS,  
819 Marchini JFM, Marino LO, Brandão Neto RA and Souza HP. Double-blind, Randomized,  
820 Placebo-controlled Trial With N-acetylcysteine for Treatment of Severe Acute Respiratory  
821 Syndrome Caused by Coronavirus Disease 2019 (COVID-19). Clin Infect Dis. 2021,  
822 72(11): e736-e741

823 [64] Kanter JE and Bornfeldt KE. Inflammation and diabetes-accelerated atherosclerosis:  
824 myeloid cell mediators. Trends Endocrinol Metab. 2013, 24(3): 137-144

825 [65] Chu J, Xing C, Du Y, Duan T, Liu S, Zhang P, Cheng C, Henley J, Liu X, Qian C, Yin  
826 B, Wang HY and Wang RF. Pharmacological inhibition of fatty acid synthesis blocks  
827 SARS-CoV-2 replication. Nat Metab. 2021: 1-10

828 [66] Bleau C, Burnette M, Filliol A, Piquet-Pellorce C, Samson M and Lamontagne L.  
829 Toll-like receptor-2 exacerbates murine acute viral hepatitis. Immunology. 2016, 149(2):  
830 204-224

831 [67] Hayashi K, Kondo N, Omori N, Yoshimoto R, Hato M, Shigaki S, Nagasawa A, Ito M  
832 and Okuno T. Discovery of a benzimidazole series as the first highly potent and selective  
833 ACSL1 inhibitors. Bioorg Med Chem Lett. 2021, 33: 127722

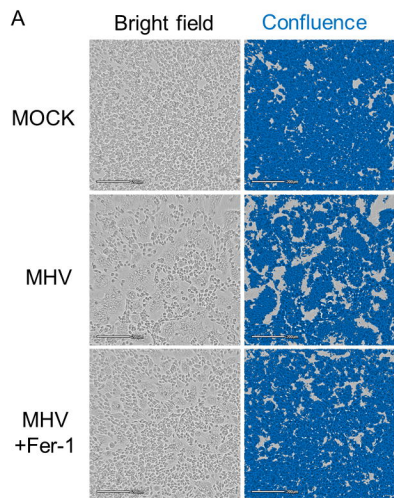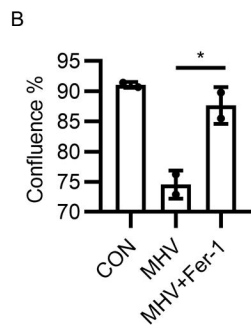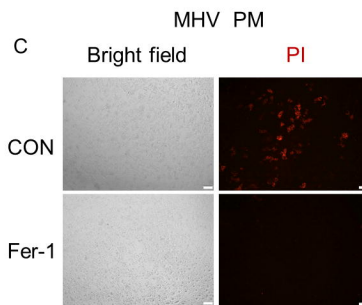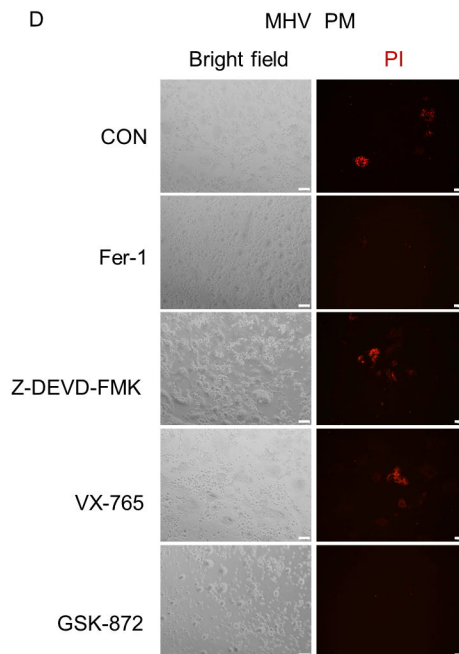

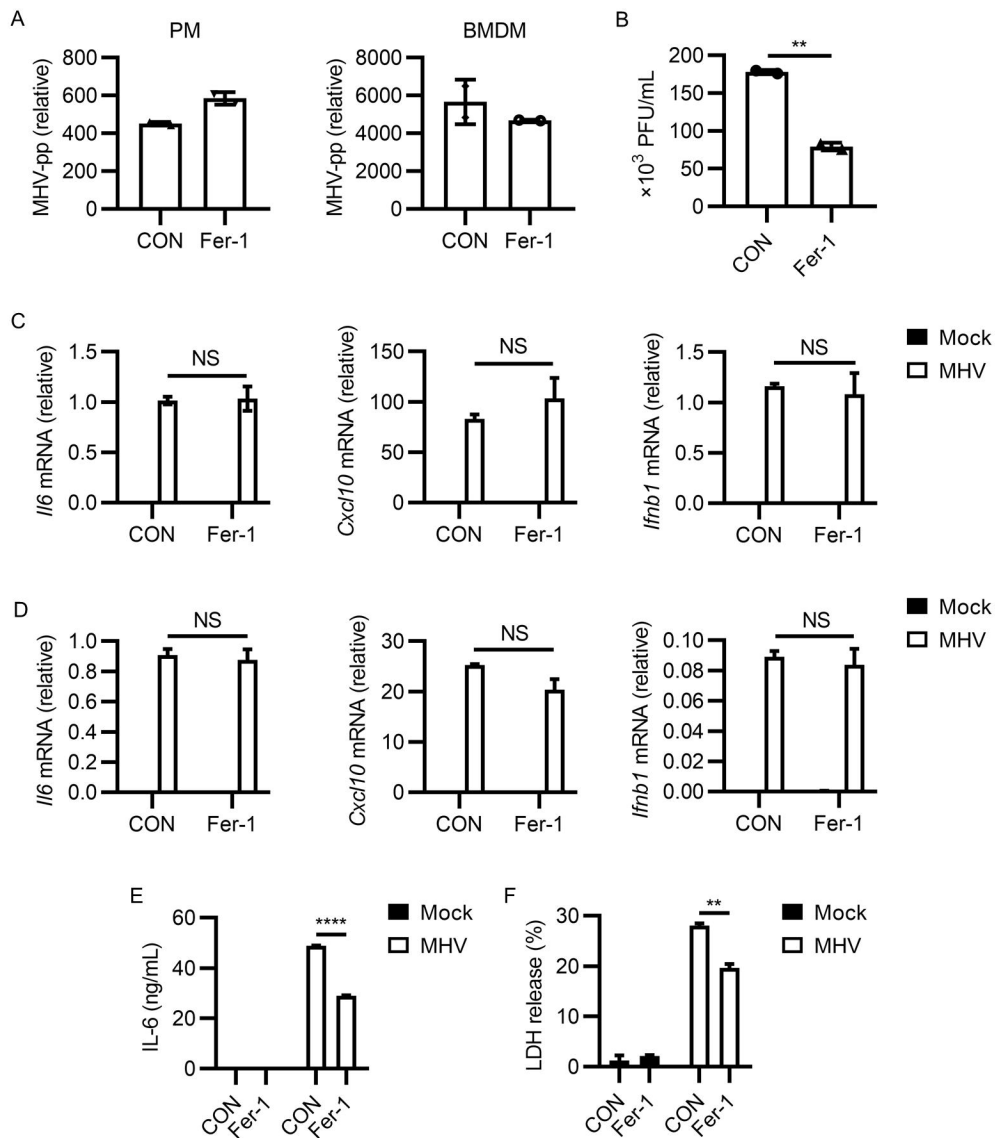



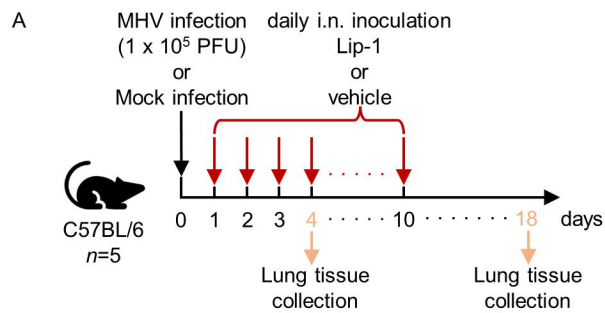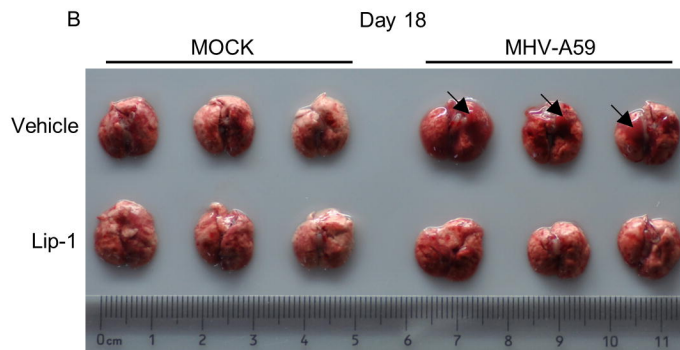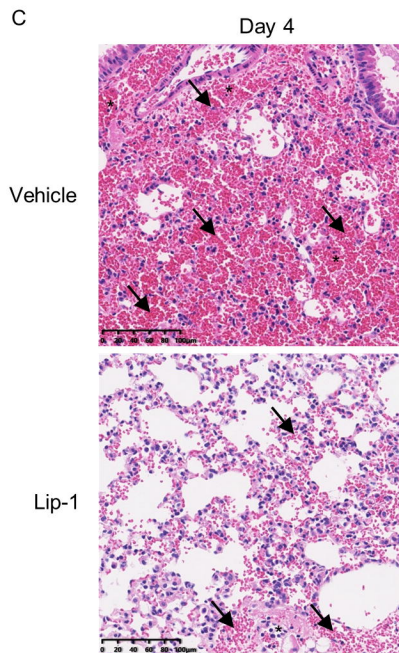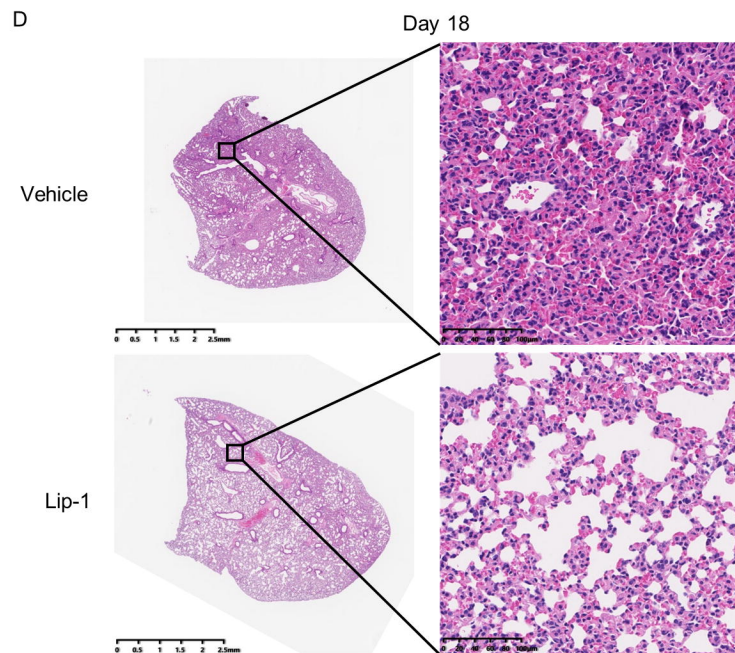

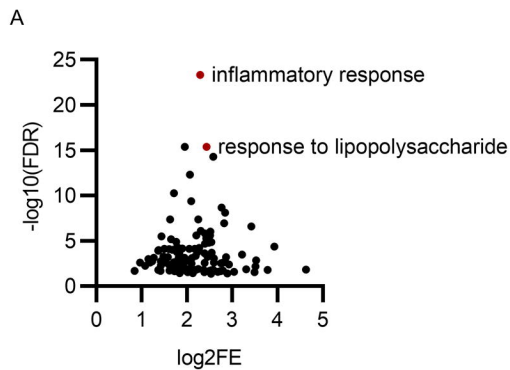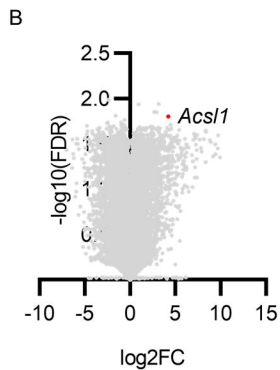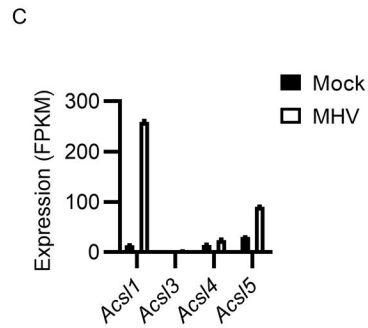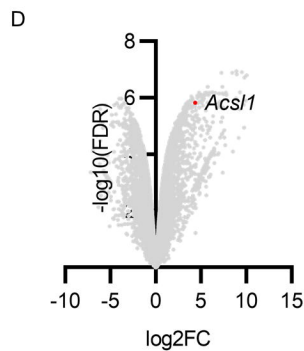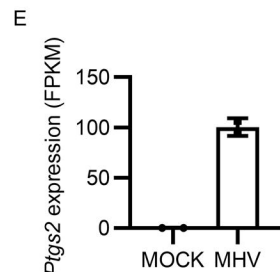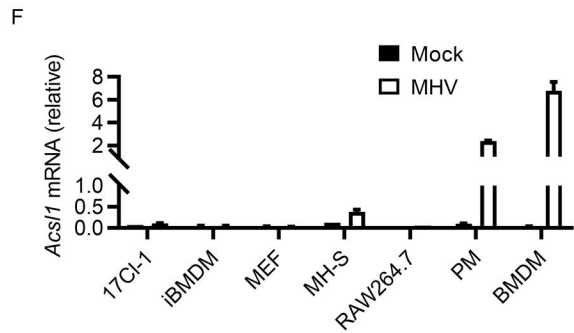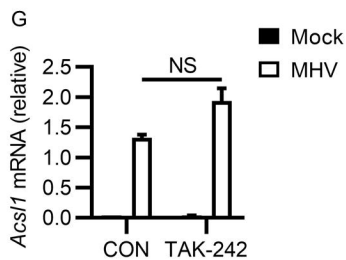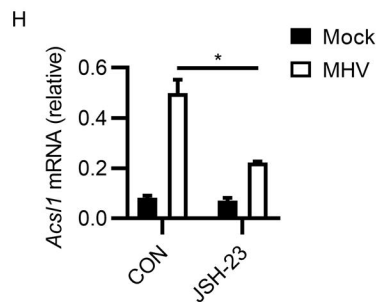

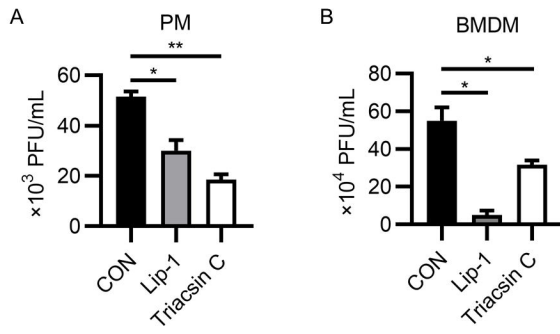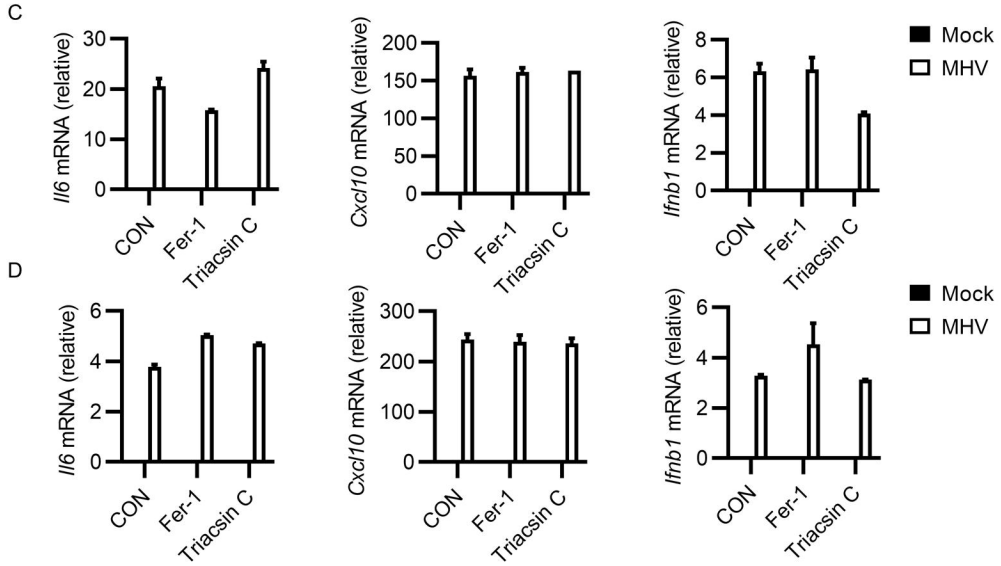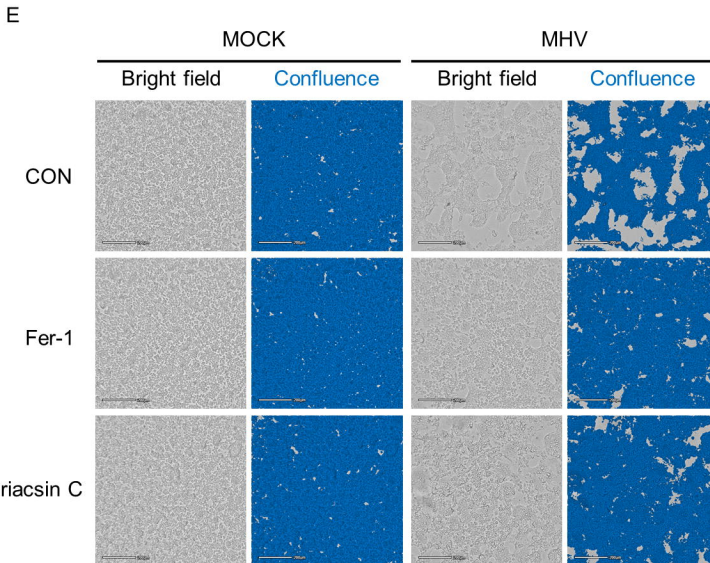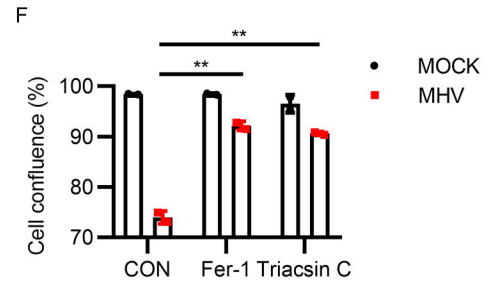

Source: https://www.biorxiv.org/content/10.1101/2021.10.14.464337v1.full.pdf
